# Supplementary material for: Supplementation of a Lacto-fermented Rapeseed-seaweed Blend Promotes Gut Microbial- and Gut Immune-Modulation in Weaner Piglets
Source: Research Square preprint supplement (doi:10.21203/rs.3.rs-142255/v1), 2021-01-13
Supplement: Supplementary file 1 [file 4cae621df3631dff6ec08186.xlsx]

## Sheet: Table 3
	0% FRS N=10	2.5% FRS N=10	5% FRS N=10	p.overall	p.0% FRS vs 2.5% FRS	p.0% FRS vs 5% FRS	p.2.5% FRS vs 5% FRS
Erythrocyte count (1012cells/L)	6.12 [5.77;6.47]	5.75 [5.43;6.07]	5.87 [5.48;6.26]	0.25	0.23	0.50	0.85
Hemoglobina (g/dL)	10.06 [9.53;10.59]	10.07 [9.37;10.77]	9.81 [9.16;10.46]	0.76	1.00	0.80	0.79
Hematocrit (%)	33.37 [31.51;35.23]	33.74 [30.92;36.56]	32.21 [29.92;34.50]	0.56	0.97	0.71	0.56
Mean corpuscular volume (fL)	54.65 [52.42;56.88]	58.73 [55.51;61.95]	54.98 [52.87;57.09]	0.03	0.04	0.98	0.07
Mean corpuscular hemoglobin (pg/cell)	16.49 [15.83;17.15]	17.55 [16.76;18.34]	16.77 [16.04;17.50]	0.07	0.07	0.81	0.22
Mean corpuscular hemoglobin concentration (g/dL)	30.20 [29.19;31.21]	29.93 [28.76;31.10]	30.49 [29.72;31.26]	0.67	0.90	0.89	0.65
Red cell distribution width (%)	24.00 [22.30;25.70]	22.37 [19.66;25.08]	24.25 [21.95;26.55]	0.37	0.49	0.98	0.40
Platelets (1011cells/L)	3.74 [3.11;4.38]	3.44 [2.61;4.28]	3.35 [2.48;4.21]	0.71	0.81	0.70	0.98
Leucocyte (1010cells/L)	3.64 [2.67;4.61]	2.93 [2.31;3.54]	2.97 [2.40;3.54]	0.24	0.29	0.33	0.99
Neutrophile (%)	55.15 [43.11;67.19]	47.54 [38.74;56.34]	56.39 [47.12;65.66]	0.33	0.46	0.98	0.36
Limphocytes (%)	40.73 [28.77;52.69]	47.14 [37.79;56.49]	38.05 [28.54;47.56]	0.37	0.59	0.91	0.35
Monocytes (%)	3.37 [1.59;5.15]	4.21 [2.68;5.74]	4.57 [2.04;7.10]	0.62	0.78	0.60	0.95
Eosinophile (%)	0.21 [<0.01;0.42]	0.73 [0.09;1.37]	0.66 [0.01;1.31]	0.27	0.29	0.39	0.98
Basophile (%)	0.54 [0.08;1.00]	0.38 [0.11;0.65]	0.33 [0.09;0.57]	0.59	0.73	0.59	0.97
Alanine aminotransferase (units/L)	54.80 [40.63;68.97]	45.70 [39.21;52.19]	48.90 [37.41;60.39]	0.43	0.41	0.68	0.89
Aspartate aminotransferase (units/L)	120.50 [40.71;200.29]	69.40 [54.69;84.11]	85.40 [56.14;114.66]	0.26	0.25	0.51	0.87
Lactate dehydrogenase (units/L)	1072.20 [690.90;1453.50]	960.30 [836.86;1083.74]	969.10 [702.71;1235.49]	0.78	0.80	0.82	1.00
Glucose (mg/dL)	102.10 [91.99;112.21]	110.00 [95.14;124.86]	105.90 [86.28;125.52]	0.72	0.69	0.92	0.90
Total protein (g/dL)	4.41 [3.86;4.96]	4.68 [4.30;5.06]	4.87 [4.15;5.59]	0.44	0.73	0.41	0.85
Blood urea nitrogen (mg/dL)	19.50 [16.04;22.96]	10.00 [5.29;14.71]	13.20 [9.87;16.53]	<0.01	<0.01	0.04	0.40
Phosphorous (mg/dL)	9.65 [7.82;11.48]	9.52 [8.38;10.66]	8.80 [7.33;10.27]	0.63	0.99	0.64	0.73
Cholesterol (mg/dL)	73.00 [57.36;88.64]	70.00 [59.74;80.26]	62.60 [53.55;71.65]	0.37	0.92	0.36	0.59
Triglycerides (mg/dL)	44.00 [25.70;62.30]	49.30 [35.66;62.94]	41.50 [33.51;49.49]	0.66	0.82	0.96	0.65
Cholesterol LDLa (mg/dL)	39.94 [30.50;49.38]	38.39 [30.86;45.92]	33.71 [27.46;39.96]	0.43	0.95	0.42	0.61
Cholesterol HDLb (mg/dL)	33.99 [26.12;41.86]	34.33 [28.81;39.85]	29.48 [24.02;34.94]	0.41	1.00	0.50	0.45
IgG (µg/mL)	2625.95 [2075.63;3176.26]	2163.86 [1945.63;2382.08]	2559.73 [2110.51;3008.95]	0.20	0.22	0.97	0.32
Lysozyme (pmol/mL)	168.09 [119.95;216.22]	154.15 [121.86;186.44]	156.09 [119.40;192.78]	0.83	0.84	0.88	1.00
aHigh-density lipoprotein
bLow-density lipoprotein
